# Supplementary material for: Screening of candidate substrates and coupling ions of transporters by thermostability shift assays
Source: eLife. 2018 Oct 15;7:e38821. doi: 10.7554/eLife.38821 (PMC6211832; doi:10.7554/eLife.38821)
Supplement: Supplementary file 2. [file elife-38821-supp2.xlsx]

## Sheet: Template
Reagent type. Duplicate rows as needed. Order is flexible, but row titles must be preserved. Species (mandatory if applicable). Append in parentheses. First mention, use full genus. Sex (if applicable). Add within parentheses after species.	Designation. Symbol/name used in publication. Separate multiple entries with semi-colon, space. (If semi-colon within designation, delimit wtith double quotes.)	Source (public). Stock center, company, data repository. Reference. Include PMID or DOI; use “this paper” if new. If neither applies enter “other” and explain in Additional Information.	Identifiers. Format as ID_source:identifier. Separate multiple entries with semi-colon, space. Include catalog numbers, stock numbers, database IDs or accession numbers, RRIDs.	Additional information. Mandatory if column C entry is “this paper” or “other”. Description of new reagent; laboratory from which reagent obtained; other pertinent information. For antibodies, indicate dilution and conditions used.
Key Resources Table
Reagent type (species) or resource	Designation	Source or reference	Identifiers	Additional information
chemical compound, drug	Adenine	Sigma	Sigma:A8626
chemical compound, drug	Adenosine	Sigma	Sigma:A9251
chemical compound, drug	AMP	Sigma	Sigma:01930
chemical compound, drug	ADP	Sigma	Sigma:A2754
chemical compound, drug	ATP	Sigma	Sigma:A2383
chemical compound, drug	dAMP	Sigma	Sigma:D6375
chemical compound, drug	dADP	Sigma	Sigma:D6000
chemical compound, drug	dATP	Sigma	Sigma:D6500
chemical compound, drug	Guanine	Sigma	Sigma:G11950
chemical compound, drug	Guanosine	Sigma	Sigma:G6264
chemical compound, drug	GMP	Sigma	Sigma:G8377
chemical compound, drug	GDP	Sigma	Sigma:G7127
chemical compound, drug	GTP	Sigma	Sigma:G8877
chemical compound, drug	dGMP	Sigma	Sigma:D9500
chemical compound, drug	dGDP	Sigma	Sigma:D9250
chemical compound, drug	dGTP	Sigma	Sigma:D4010
chemical compound, drug	Cytosine	Fluka	Fluka:30430
chemical compound, drug	Cytidine	Sigma	Sigma:C4654
chemical compound, drug	CMP	Sigma	Sigma:C1006
chemical compound, drug	CDP	Sigma	Sigma:C9755
chemical compound, drug	CTP	Sigma	Sigma:C1506
chemical compound, drug	dCMP	Sigma	Sigma:D7625
chemical compound, drug	dCDP	Sigma	Sigma:D7250
chemical compound, drug	dCTP	Sigma	Sigma:D4635
chemical compound, drug	Uracil	Sigma	Sigma:U0750
chemical compound, drug	Uridine	Sigma	Sigma:U3750
chemical compound, drug	UMP	Sigma	Sigma:U6375
chemical compound, drug	UDP	Sigma	Sigma:94330
chemical compound, drug	UTP	Sigma	Sigma:94370
chemical compound, drug	dUMP	Sigma	Sigma:D3876
chemical compound, drug	dUTP	Sigma	Sigma:D4001
chemical compound, drug	Thymine	Sigma	Sigma:T0376
chemical compound, drug	Thymidine	Sigma	Sigma:T9250
chemical compound, drug	TMP	Sigma	Sigma:T9758
chemical compound, drug	TDP	Sigma	Sigma:T9375
chemical compound, drug	TTP	Sigma	Sigma:T0251
chemical compound, drug	Inosine	Sigma	Sigma:I4125
chemical compound, drug	IMP	Sigma	Sigma:I4625
chemical compound, drug	IDP	Fluka	Sigma:57490
chemical compound, drug	ITP	Sigma	Sigma:I0879
chemical compound, drug	dIMP	Sigma	Sigma:D0126
chemical compound, drug	dITP	Sigma	Sigma:D0758
chemical compound, drug	Xanthine	Sigma	Sigma:X4002
chemical compound, drug	ADP-ribose	Sigma	Sigma:A0752
chemical compound, drug	NAD+	Sigma	Sigma:N6522
chemical compound, drug	NADH	Sigma	Sigma:N8129
chemical compound, drug	NADPH	Sigma	Sigma:N6505
chemical compound, drug	NADP+	Sigma	Sigma:N5755
chemical compound, drug	FAD	Sigma	Sigma:F6625
chemical compound, drug	FMN	Sigma	Sigma:F6750
chemical compound, drug	Nicotinamide	Sigma	Sigma:N3376
chemical compound, drug	L-Alanine	Sigma	Sigma:A7469
chemical compound, drug	L-Valine	Sigma	Sigma:V0500
chemical compound, drug	L-Isoleucine	Sigma	Sigma:I2752
chemical compound, drug	L-Leucine	Sigma	Sigma:L8912
chemical compound, drug	L-Methionine	Sigma	Sigma:M9625
chemical compound, drug	L-Phenylalanine	Sigma	Sigma:P5482
chemical compound, drug	L-Tyrosine	Sigma	Sigma:T8566
chemical compound, drug	L-Tryptophan	Sigma	Sigma:T0254
chemical compound, drug	L-Proline	Calbiochem	Calbiochem:5370
chemical compound, drug	Glycine	Fisher	Fisher:G/0800/60
chemical compound, drug	L-Serine	Sigma	Sigma:S4500
chemical compound, drug	L-Threonine	Fluka	Sigma:89179
chemical compound, drug	L-Asparagine	Sigma	Sigma:A4159
chemical compound, drug	L-Glutamine	Sigma	Sigma:G8540
chemical compound, drug	L-Cysteine	Fluka	Sigma:30090
chemical compound, drug	L-Arginine	Fluka	Sigma:11039
chemical compound, drug	L-Histidine	Sigma	Sigma:H8125
chemical compound, drug	L-Lysine	Sigma	Sigma:L5501
chemical compound, drug	L-Aspartate	Sigma	Sigma:A8949
chemical compound, drug	L-Glutamate	Sigma	Sigma:G1626
chemical compound, drug	S-Adenosyl-L-methionine	Sigma	Sigma:A4377
chemical compound, drug	S-Adenosyl-L-homocysteine	Sigma	Sigma:A9384
chemical compound, drug	5-Aminolevulinate	Sigma	Sigma:A3785
chemical compound, drug	Orthophosphate	Sigma	Sigma:342483
chemical compound, drug	Manganese (II) chloride	Sigma	Sigma:M5005
chemical compound, drug	Zinc (II) chloride	Sigma	Sigma:208086
chemical compound, drug	Potassium chloride	Fluka	Sigma:60128
chemical compound, drug	Sodium chloride	Fisher	Fisher:S/3120/63
chemical compound, drug	Lithium chloride	BDH	BDH:103743E
chemical compound, drug	Magnesium chloride	Fisher	Fisher:BP214
chemical compound, drug	Calcium chloride	Acros	Acros:423525000
chemical compound, drug	Thiamine	Sigma	Sigma:T1270
chemical compound, drug	Thiamin diphosphate	Sigma	Sigma:C8754
chemical compound, drug	Riboflavin	Sigma	Sigma:R4500
chemical compound, drug	Niacin	Sigma	Sigma:N5410
chemical compound, drug	Pantothenic acid	Sigma	Sigma:P2250
chemical compound, drug	Pyridoxine	Calbiochem	Sigma:545072
chemical compound, drug	Pyridoxal	Sigma	Sigma:P9130
chemical compound, drug	Pyridoxal phosphate	Sigma	Sigma:P9255
chemical compound, drug	Pyridoxamine	Sigma	Sigma:P9380
chemical compound, drug	Biotin	Sigma	Sigma:B4501
chemical compound, drug	Folate	Sigma	Sigma:F8758
chemical compound, drug	Cobalamin	Sigma	Sigma:V2876
chemical compound, drug	Ascorbate	Sigma	Sigma:A7506
chemical compound, drug	p-Aminobenzoic Acid	Sigma	Sigma:A9878
chemical compound, drug	D-Glucosamine	Sigma	Sigma:G4875
chemical compound, drug	D-Glucosamine 6-phosphate	Sigma	Sigma:G5509
chemical compound, drug	Acetone	Fisher	Fisher:A/0560/17
chemical compound, drug	3-Hydroxybutanoate	Sigma	Sigma:166898
chemical compound, drug	Aminoacetone	Sigma	Sigma:CDS020585
chemical compound, drug	Hydroxyacetone	Sigma	Sigma:138185
chemical compound, drug	Acetoacetyl	Sigma	Sigma:A8509
chemical compound, drug	Acetyl phosphate	Sigma	Sigma:A0262
chemical compound, drug	Lipoamide	Sigma	Sigma:T5875
chemical compound, drug	3-Methyl-2-oxobutanoic acid	Sigma	Sigma:68253
chemical compound, drug	3-Methyl-2-oxopentanoic acid	Sigma	Sigma:198978
chemical compound, drug	Levulinic acid	Sigma	Sigma:L2009
chemical compound, drug	Pyruvate	Sigma	Sigma:P2256
chemical compound, drug	Phenylpyruvate	Sigma	Sigma:P8001
chemical compound, drug	Acetoacetate	Sigma	Sigma:A8509
chemical compound, drug	Glycoxylate	Sigma	Sigma:G4502
chemical compound, drug	Oxaloacetate	Sigma	Sigma:O4126
chemical compound, drug	Malonate	Sigma	Sigma:63409
chemical compound, drug	(S)-Malate	Sigma	Sigma:M1000
chemical compound, drug	Maleate	Sigma	Sigma:M0375
chemical compound, drug	Succinate	Sigma	Sigma:14170
chemical compound, drug	Glutarate	Sigma	Sigma:G3407
chemical compound, drug	2-Oxoglutarate	Sigma	Sigma:K1750
chemical compound, drug	Adipate	Sigma	Sigma:G3409
chemical compound, drug	2-Oxoadipate	Sigma	Sigma:75447
chemical compound, drug	2-Aminoadipate	Sigma	Sigma:A26357
chemical compound, drug	Pimelate	Sigma	Sigma:P45001
chemical compound, drug	Citrate	Sigma	Sigma:S4641
chemical compound, drug	Isocitrate	Sigma	Sigma:I1252
chemical compound, drug	cis-Aconitate	Sigma	Sigma:A3412
chemical compound, drug	Oxidised glutathione	Sigma	Sigma:G6654
chemical compound, drug	Phosphoenolpyruvate	Sigma	Sigma:P05645
chemical compound, drug	Choline	Sigma	Sigma:C7527
chemical compound, drug	Fumarate	Fluka	Sigma:47910
chemical compound, drug	L-Lactate	Sigma	Sigma:L7022
chemical compound, drug	L-Citrulline	Sigma	Sigma:C7629
chemical compound, drug	L-Ornithine	Sigma	Sigma:O4386
chemical compound, drug	L-Carnitine	Sigma	Sigma:C0283
chemical compound, drug	Acetyl carnitine	Sigma	Sigma:A6706
chemical compound, drug	Taurine	Sigma	Sigma:T0625
chemical compound, drug	Histamine	Sigma	Sigma:H7125
chemical compound, drug	Putrescine (1,4-diaminobutane)	Sigma	Sigma:P7505
chemical compound, drug	Cadaverine (1,5-pentanediamine)	Sigma	Sigma:D22606
chemical compound, drug	Spermidine	Sigma	Sigma:S2626
chemical compound, drug	Spermine	Sigma	Sigma:85509
chemical compound, drug	Acetaldehyde	Sigma	Sigma:402788
chemical compound, drug	Urea	Sigma	Sigma:U5378
chemical compound, drug	L-Homocysteine	Sigma	Sigma:69453
chemical compound, drug	Creatine	Sigma	Sigma:C0780
chemical compound, drug	Phosphocreatine	Sigma	Sigma:P7936
chemical compound, drug	Glycerol	Fisher	Sigma:G/0600/08
chemical compound, drug	Methylglyoxal	Sigma	Sigma:M0252
chemical compound, drug	L-xylose	Sigma	Sigma:X1625
chemical compound, drug	D-xylose	Sigma	Sigma:X1500
chemical compound, drug	L-talose	Sigma	Sigma:T8646
chemical compound, drug	D-talose	Sigma	Sigma:86256
chemical compound, drug	D-ribose	Sigma	Sigma:R7500
chemical compound, drug	myoinositol	Sigma	Sigma:I5125
chemical compound, drug	D-melibiose	Sigma	Sigma:63630
chemical compound, drug	L-mannose	Sigma	Sigma:M1134
chemical compound, drug	D-mannose	Sigma	Sigma:M6020
chemical compound, drug	glycerol	Sigma	Sigma:G5516
chemical compound, drug	L-rhamnose	Sigma	Sigma:W373011
chemical compound, drug	6-deoxy-D-glucose	Sigma	Sigma:D9761
chemical compound, drug	2-deoxy-D-glucose	Sigma	Sigma:D8375
chemical compound, drug	L-glucose	Sigma	Sigma:G5500
chemical compound, drug	D-glucose	Sigma	Sigma:G8270
chemical compound, drug	D-glucuronic acid	Sigma	Sigma:G5269
chemical compound, drug	D-gluconate	Sigma	Sigma:G9005
chemical compound, drug	glucitol	Sigma	Sigma:S1876
chemical compound, drug	2-deoxy-D-galactose	Sigma	Sigma:D4407
chemical compound, drug	methyl-β-D-galactose	Sigma	Sigma:M0285
chemical compound, drug	L-galactose	Sigma	Sigma:G7134
chemical compound, drug	D-galactose	Sigma	Sigma:G0750
chemical compound, drug	L-fucose	Sigma	Sigma:F2252
chemical compound, drug	D-fucose	Sigma	Sigma:F8150
chemical compound, drug	L-fructose	Sigma	Sigma:31140
chemical compound, drug	D-fructose	Sigma	Sigma:F0127
chemical compound, drug	L-arabinose	Sigma	Sigma:A3250
chemical compound, drug	D-arabinose	Sigma	Sigma:A3131
