# Supplementary figures and images for: Screening of candidate substrates and coupling ions of transporters by thermostability shift assays
Source: eLife journal article supplement (doi:10.7554/elife.38821), 2018-10-15

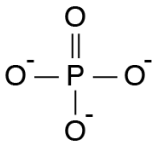

phosphate

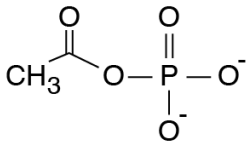

acetyl phosphate

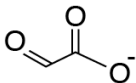

glyoxylate

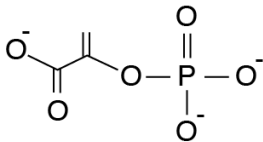

phosphoenolpyruvate

Supplement: supp [file elife-38821-supp-v1.zip]
